# Supplementary material
Source: publisher figshare collection journal article supplement (https://sage.figshare.com/ndownloader/files/16356848)
Supplement: Supplementary file 1 [file 16356848]

## Supplemental Appendix

| <b>Summary of Infection Definitions</b> |                                                                                                                                                                                                                                                                                |
|-----------------------------------------|--------------------------------------------------------------------------------------------------------------------------------------------------------------------------------------------------------------------------------------------------------------------------------|
| <b>Infection</b>                        | <b>Definition</b>                                                                                                                                                                                                                                                              |
| BK Nephropathy                          | Allograft biopsy demonstrating cytopathic changes and positive SV40 stain                                                                                                                                                                                                      |
| Cytomegalovirus (CMV) Infection         | Active CMV detected in blood by quantitative polymerase chain reaction (PCR)                                                                                                                                                                                                   |
| Urinary Tract Infection (UTI)           | A quantitative count of microorganism ( $\geq 10^5$ ) in an appropriately collected urine specimen                                                                                                                                                                             |
| Bacteremia                              | Presence of a pathogen other than common skin contaminants, e.g. diphtheroids and coagulase negative staphylococci cultured from one or more blood cultures, or the presence of a common skin contaminant cultured from two or more blood cultures drawn on separate occasions |
| Wound Infection                         | Presence of a purulent discharge from skin, subcutaneous or deep soft tissue                                                                                                                                                                                                   |
| <i>Clostridium difficile</i> Infection  | Presence of toxigenic <i>C.difficile</i> (by PCR) in the stool of a symptomatic patient                                                                                                                                                                                        |
| Fungal Infection                        | Culture isolation of a fungal organism from a sterile body site                                                                                                                                                                                                                |
